# Supplementary material
Source: PubMed Central journal article supplement (PMC6026005)
Supplement: jci-128-98765-s195.pdf [file jci-128-98765-s195.pdf]

## Supplemental Data

### Figure S1. Related to Figure 1: Silencing USP7 Decreases NEK2-induced

#### Bortezomib Resistance

OCI-MY5 cells transduced with EV, NEK2-OE or NEK2-OE + USP7-shRNA were treated with DOX to suppress USP7 expression in NEK2-OE cells. After 72 hours, cells were treated with bortezomib (5nM) for further 24 hours and cell viability was measured using trypan blue stain.

### Figure S2. Related to Figure 2: USP7 Deubiquitinizes NEK2 Protein

(A) H1299 cells were transfected with USP7-shRNA, after 72-hour induction with DOX, followed by protein extraction. Western blot were performed using anti-USP7, NEK2 and  $\beta$ -actin antibodies. (B) ARP1 cells were treated with P5091 overnight at 16 $\mu$ M. Cells were lysed, and protein extract was analyzed by western blot using USP7, USP47, NEK2, and GAPDH antibodies. (C) ARP1 cells were treated with P5091 overnight at 16 $\mu$ M. Cells were lysed, total RNA was extracted and analyzed for NEK2 mRNA expression by qRT-PCR (NS: No Significance). (D & E) OCI-MY5 (D) and H1299 (E) cells were treated with P5091 at different doses or a combination with the proteasome inhibitor MG132 for 5 hours. NEK2 protein levels were analyzed by western blot using NEK2 and  $\beta$ -actin antibodies. (F) Input controls for immunoprecipitation of Figure 2H. H1299 cells were co-transfected with HA-UB and NEK2-OE vectors with or without a USP7-OE plasmids. Cells were lysed in the presence of NEM and protein extracts were analyzed by western blot using NEK2, USP7, and  $\beta$ -actin antibodies.

**Figure S3. Related to Figure 3: Overexpression of NEK2 increases phosphorylated p-65 in myeloma cell lines.** ARP1 and OCI-MY5 myeloma cells overexpressing NEK2 were lysed. NEK2 and p65-S536 phosphorylation levels were analyzed between NEK2-OE and EV cells by western blot.

**Figure S4. Related to Figure 4: NEK2 Activates NF- $\kappa$ B signaling via AKT**

(A) H1299 cells transfected with EV or NEK2-OE were lysed and analyzed by western blot using NEK2, P-I $\kappa$ B $\alpha$ , and GAPDH antibodies. (B) H1299 cells transfected with EV or NEK2-OE were treated with vehicle or MK-2206 2HCl for 30 minutes. Protein was extracted and analyzed by western blot using P-p65-S536, and  $\beta$ -actin antibodies. (C) H1299 cells transfected with NEK2-shRNA or Scramble were induced with DOX for 48 hours and then treated with tautomycin for another 24 hours. Cells were lysed and analyzed by western blot using NEK2, P-p65-S536, P-PP1 $\alpha$ , and P-AKT-S473 antibodies.

**Figure S5. Related to Figure 7: INH1 and P5091 Overcome NEK2-induced Bortezomib Resistance**

Mouse weight was calculated at the starting and ending of the injection of NEK2-OE ARP1 cells expressing luciferase into NOD-Rag1<sup>null</sup> mice. After one-week injection of NEK2-OE cells, mice were treated with (1) vehicle, (2) BTZ (3mg/kg, IP, 2 times/week), (3) INH1 (100mg/kg, IP, 3 times/week), (4) P5091 (10mg/kg, IV, 2 times/week), (5) P5091 + BTZ, and (6) INH1 + BTZ Mice for 28 days.

**Table S1. Related to Figure 1: Protein List Identified by TAP-MS Bound to NEK2.**

**Tables S2. Related to Figure 5: p65 Binding Sites to Direct Target Genes**

**Regulated by NEK2 Identified by ENCODE at UCSC.**

Supplemental Figure 1

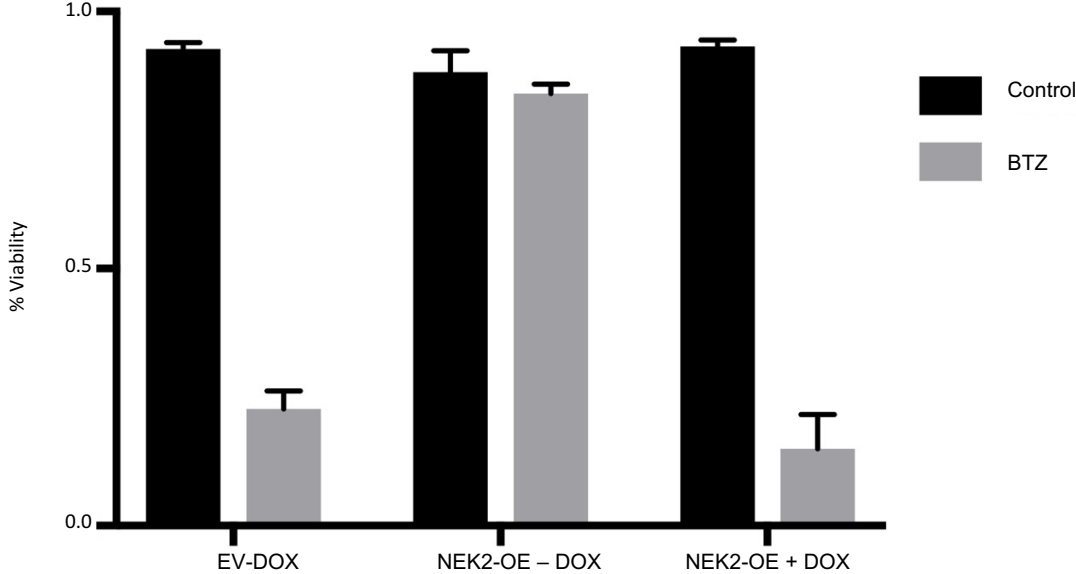

# Supplemental Figure 2

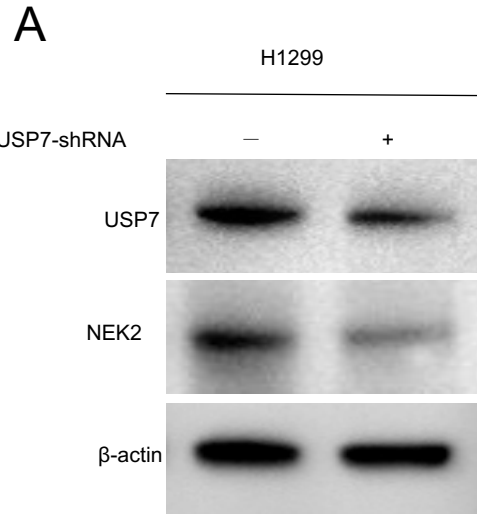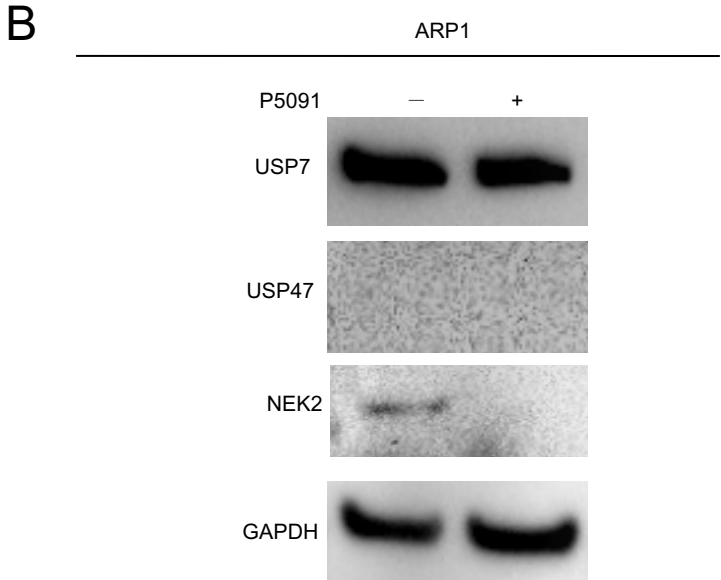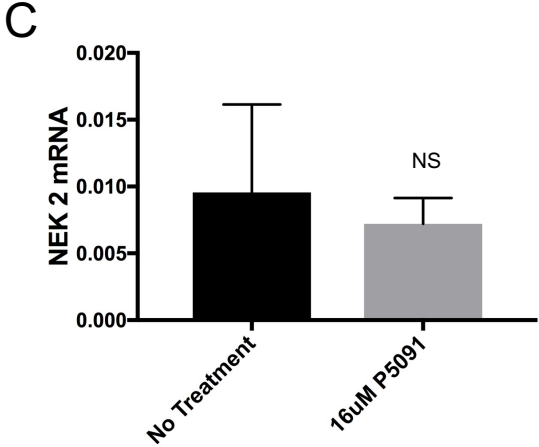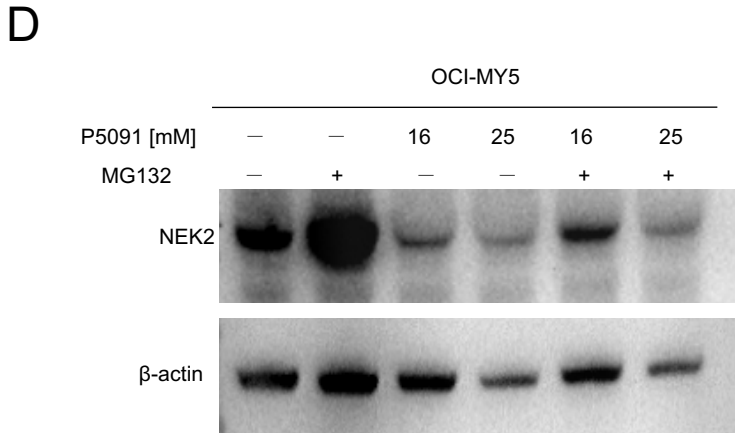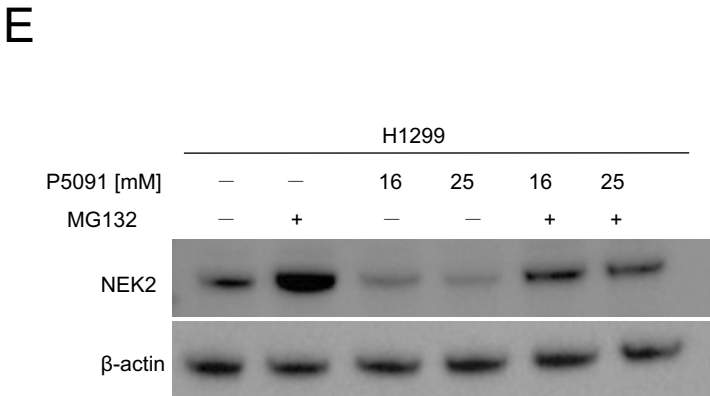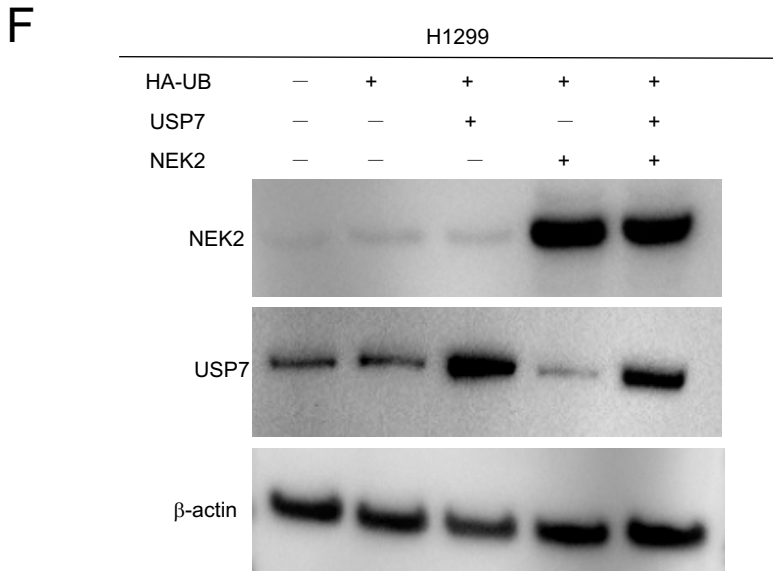

Supplemental Figure 3

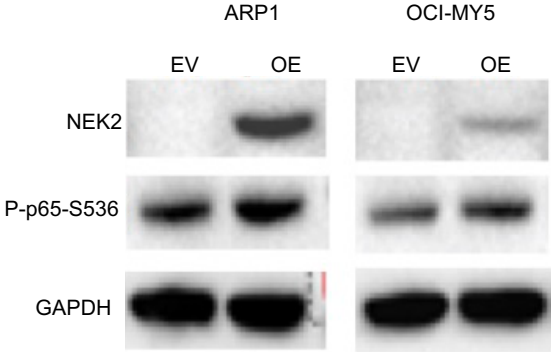

# Supplemental Figure 4

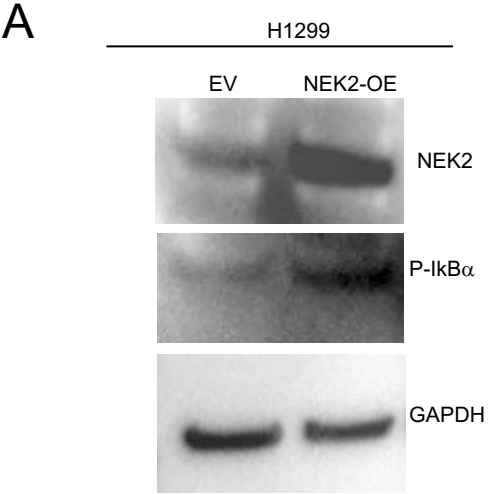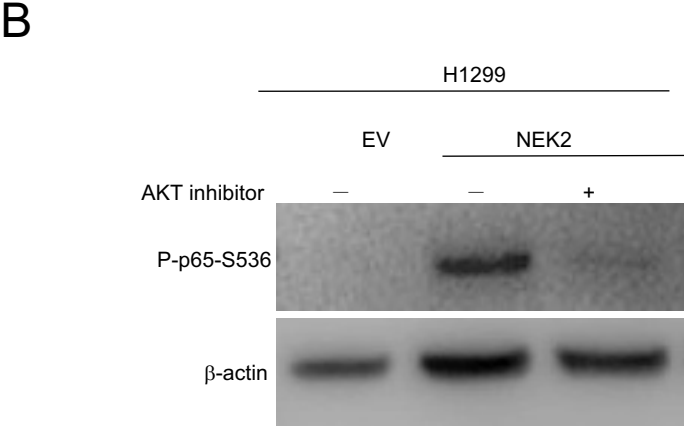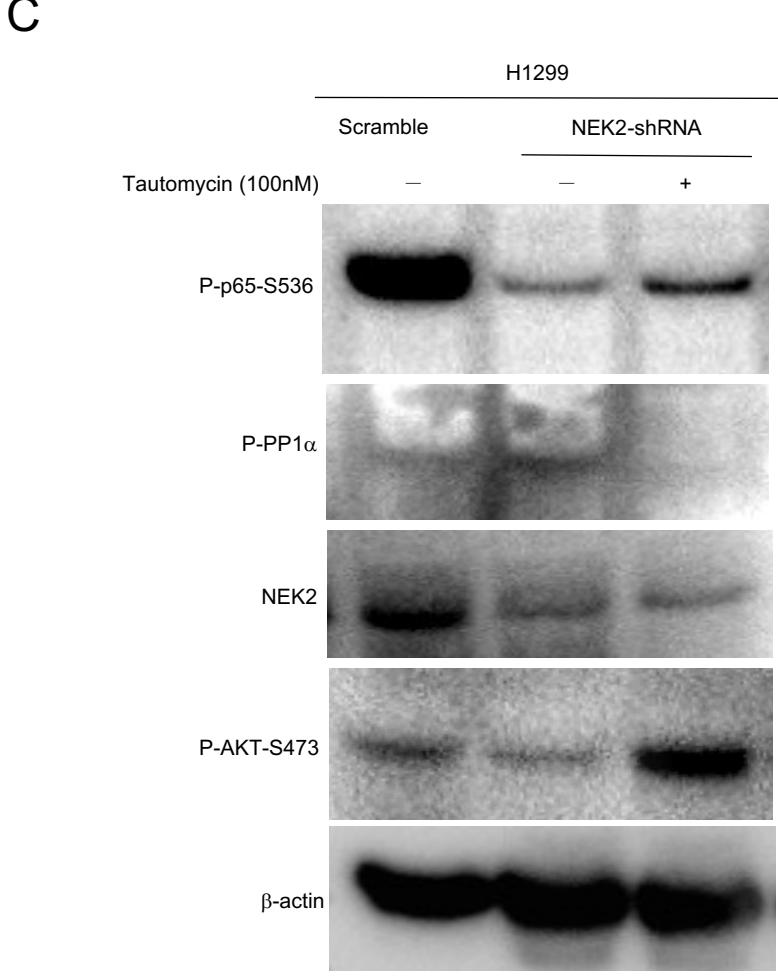

Supplemental Figure 5

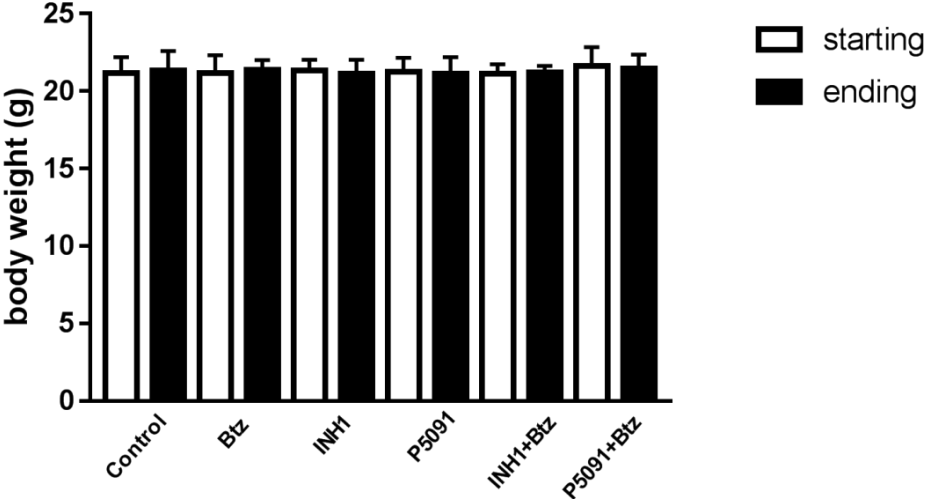



Supplemental Table 2

| <b>Gene Symbol</b> | <b>p65 binding site*</b>      |
|--------------------|-------------------------------|
| <i>HPSE</i>        | chr4:84,262,139-84,262,508    |
| <i>HMGB1</i>       | chr13:31,038,167-31,038,595   |
| <i>LCP1</i>        | chr13:46,739,634-46,740,590   |
| <i>DARS2</i>       | chr1:173,793,487-173,794,076  |
| <i>NEDD1</i>       | chr12:97,285,732-97,286,132   |
| <i>PRKDC</i>       | chr8:48,790,935-48,791,348    |
| <i>CDCA2</i>       | chr8:25,316,433-25,316,836    |
| <i>CDC2</i>        | chr14:50,810,854-50,811,264   |
| <i>TPX2</i>        | chr20:30,311,226-30,312,035   |
| <i>SMC4</i>        | chr3:160,117,270-160,117,688  |
| <i>PPP1R12A</i>    | chr12:80,328,739-80,329,571   |
| <i>MKI67</i>       | chr10:129,924,754-129,925,158 |
| <i>PLAC8</i>       | chr4:84,031,300-84,031,974    |
| <i>DYRK2</i>       | chr12:68,042,402-68,042,777   |
| <i>PTEN</i>        | chr10:89,623,165-89,623,590   |
| <i>NLK</i>         | chr17:26,382,567-26,382,950   |
| <i>MLL</i>         | chr6:168,106,886-168,107,255  |
| <i>ALCAM</i>       | chr3:105,085,406-105,086,113  |
| <i>NFE2L1</i>      | chr17:46,126,327-46,126,777   |
| <i>GLG1</i>        | chr16:74,486,191-74,486,614   |
| <i>TGOLN2</i>      | chr2:85,545,632-85,546,001    |
| <i>CYLD</i>        | chr16:50,775,635-50,776,546   |
| <i>ALDH2</i>       | chr12:112,211,700-112,212,283 |
| <i>DCP2</i>        | chr5:112,312,074-112,312,787  |
| <i>TMED4</i>       | chr7:44,621,599-44,622,341    |
| <i>RC3H2</i>       | chr9:125,667,614-125,668,078  |
| <i>EXT2</i>        | chr11:44,117,125-44,117,528   |
| <i>IL15</i>        | chr4:142,556,807-142,557,225  |
| <i>TMEM179B</i>    | chr11:62,554,693-62,555,096   |
| <i>TTC17</i>       | chr11:43,380,226-43,380,814   |
| <i>C14ORF100</i>   | chr14:59,910,898-59,911,267   |

\* Human Feb. 2009 (GRCh37/hg19 from UCSC Genome Browser) Assembly, Track Name: GM12878+TNFa RELA Cell line: GM12878 (B cell)
